# Supplementary material
Source: PubMed Central journal article supplement (PMC3088630)
Supplement: 1017615108_pnas.201017615SI.pdf [file 1017615108_pnas.201017615SI.pdf]

# Supporting Information

Wheeler et al. 10.1073/pnas.1017615108

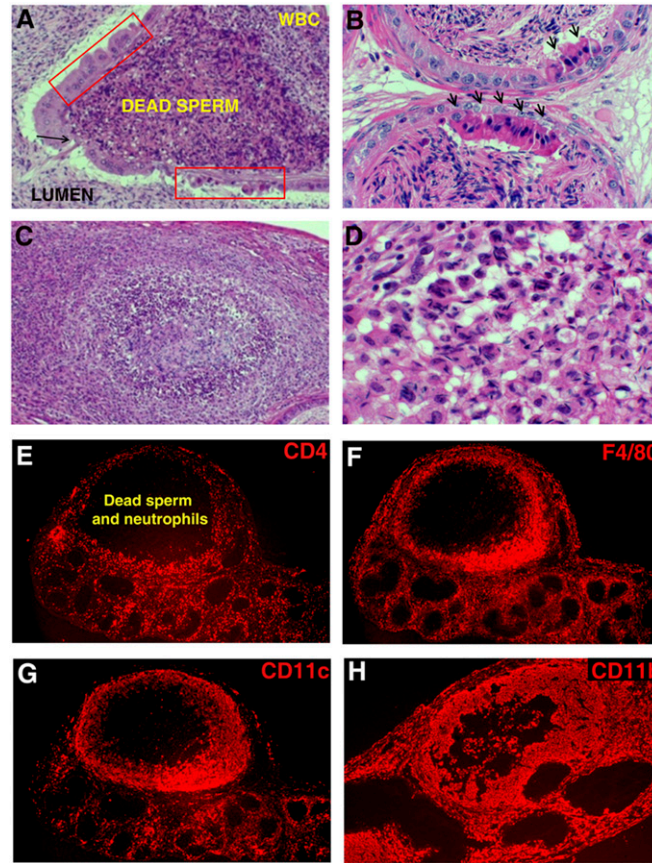

**Fig. S1.** Ipsilateral sperm granulomas in uni-vx mice have intense inflammation. Epididymis at 1 to 2 wk after vasectomy: (A) sperm extravasate (arrow) from duct with necrotic epithelial cells (red boxes); dead sperm and leukocytes (WBC) accumulate outside duct. (B) Focal apoptotic epithelial cells in cauda epididymis 24 h after vasectomy; note cells with red cytoplasm and pyknotic nuclei (arrows). Epididymis 8 to 10 wk after unilateral vasectomy: (C) organized sperm granuloma and (D) phagocytosis of sperm by macrophages. (H&E stain; magnification: A, 100 $\times$ ; B, 40 $\times$ ; C and D, 400 $\times$ .) (E–H) Accumulation of CD4<sup>+</sup> T cells, F4/80<sup>+</sup> macrophages, CD11c<sup>+</sup> dendritic cells, and CD11b<sup>+</sup> cells, respectively, in epididymal granuloma at 5 wk by fluorescence microscopy. (Magnification of 40 $\times$ .) The TSA Biotin System (PerkinElmer) was used for immunohistology, with primary antibodies to the following: CD11c (HL3), CD11b (M1/70), F4/80 (C1:A3-1), and CD4 (L3T4).



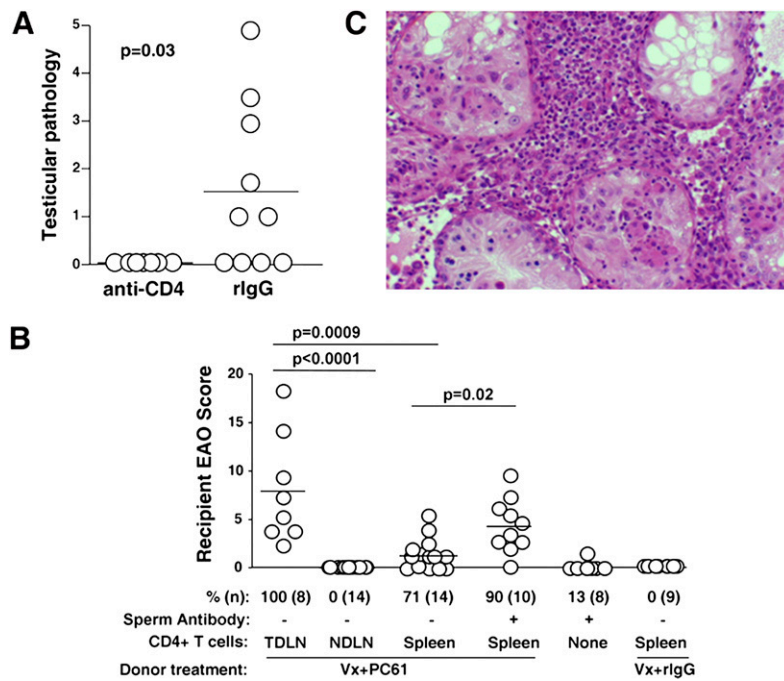

**Fig. 54.** CD4<sup>+</sup> T cells are necessary and sufficient for EAO induction, whereas autoantibody enhances pathology. (A) CD4 antibody inhibits orchitis development in uni-vx mice with Treg depletion. (B) Severe EAO is adoptively transferred only by CD4 T cells from testis-draining LNs (TDLN); and the mild EAO induced by spleen T cells is enhanced by cotransfer of serum sperm antibody IgG (NDLN, nondraining LN). (C) Severe EAO in TDLN CD4 T-cell recipient. (H&E stain, magnification of 400 $\times$ .) CD4 T cells were depleted in vivo by GK1.1 (0.5 mg dose) from 4 to 7 wk. CD4 T cells were isolated magnetically from TDLNs (renal), NDLNs (axillary and brachial), or spleen, stimulated by CD3 antibody, and transferred at  $2 \times 10^7$  cells per mouse. Testis-shielded recipients were irradiated with 650 rad (Varian 2300 Linear Accelerator) twice, 7 d apart, and received T cells 1 d later. Testis pathology was studied at 5 wk. IgG isolated by protein G column from sera of Treg-depleted uni-vx mice was transferred i.p.

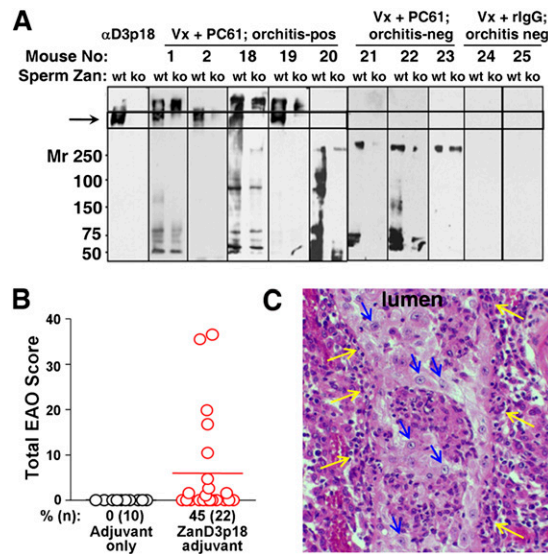

**Fig. 55.** Orchitogenic D3p18 polypeptide of Zan is a major antigen targeted by serum autoantibodies of uni-vx and Treg-depleted B6AF1 mice with EAO. (A) Zan-specific serum antibody binds to WT but not Zan-KO sperm antigens in adjacent lanes (arrow, 340-kDa band). As a result, in uni-vx mice with Treg depletion, Zan antibody is detected in EAO-positive (mice 1, 2, 5, 18, and 19), but not EAO-negative (mice 21, 22, and 23) mice. Control mice 24 and 25 are negative for Zan antibody. (B) EAO in B6AF1 mice immunized with Zan D3p18 in complete Freund's adjuvant. (C) Histopathology of a seminiferous tubule with severe EAO in a ZanD3p18-immunized mouse shows activated mononuclear cells at the BTB (yellow arrows). Inside seminiferous tubular lumen, leukocyte accumulation, germ cell depletion, and central displacement of Sertoli cells in the seminiferous tubule are evident (blue arrows). (H&E stain, magnification of 400 $\times$ .)
